# Supplementary material
Source: publisher figshare collection journal article supplement (https://acs.figshare.com/ndownloader/files/9231778)
Supplement: Supplementary file 1 [file 9231778]

## Supporting Information

# Few-layered Trigonal WS<sub>2</sub> Nanosheets Coated Graphite Foam as an Efficient Free-standing Electrode for Hydrogen Evolution Reaction

*Xiaomeng Guo<sup>§\*</sup>, Junyi Ji<sup>Φ\*</sup>, Quanguo Jiang<sup>◊</sup>, Lili Zhang<sup>∞</sup>, Zhimin Ao<sup>∞\*</sup>, Xiaobin Fan<sup>§</sup>, Shaobin Wang<sup>◊</sup>, Yang Li<sup>§</sup>, Fengbao Zhang<sup>§</sup>, Guoliang Zhang<sup>§</sup>, Wenchao Peng<sup>§\*</sup>*

<sup>§</sup> School of Chemical Engineering and Technology, Tianjin University Tianjin 300072, China.

<sup>Φ</sup> School of Chemical Engineering, Sichuan University, Chengdu, Sichuan 610065, China.

<sup>◊</sup> College of Mechanics and Materials, Hohai University, Nanjing 210098, China

<sup>∞</sup> Institute of Chemical and Engineering Sciences, A\*STAR, 1 Pesek Road, Jurong Island, 627833 Singapore

<sup>∞</sup> Institute of Environmental Health and Pollution Control, School of Environmental Science and Engineering, Guangdong University of Technology, Guangzhou, 510006, China.

<sup>◊</sup> Department of Chemical Engineering, Curtin University, Perth WA 6845, Australia

### Corresponding Author

\*E-mail: wenchao.peng@tju.edu.cn

\*E-mail: zhimin.ao@gdut.edu.cn

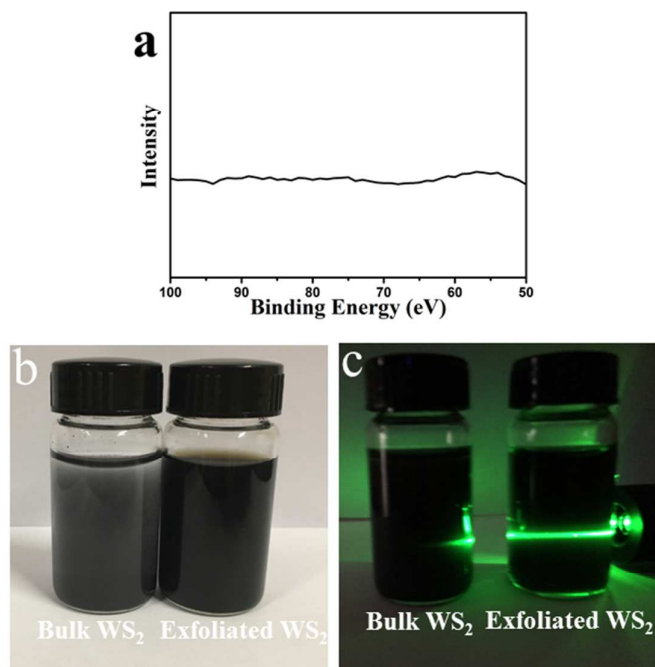

Figure S1. XPS spectra of the exfoliated WS<sub>2</sub> (a), optical image of aqueous solution of bulk WS<sub>2</sub> and exfoliated WS<sub>2</sub> (b,c).

The exfoliated WS<sub>2</sub> was analyzed by X-ray photoelectron spectroscopy (XPS) in the range of 50~100 eV. In the XPS spectrum (Figure S1a), no peaks were observed in the binding energy range of 50-100 eV,<sup>S1</sup> indicating the absence of lithium (53 eV, 55 eV and 56 eV) in the WS<sub>2</sub> nanosheets. As shown in Figure S1b, the dispersed exfoliated WS<sub>2</sub> nanosheets solution exhibits a homogeneous black colloid without any deposition in hours. Moreover, with a green laser irradiating from the vial right side, the obvious Tyndall phenomenon can be observed in Figure S1c, suggesting the uniform dispersion in water.<sup>S2</sup>

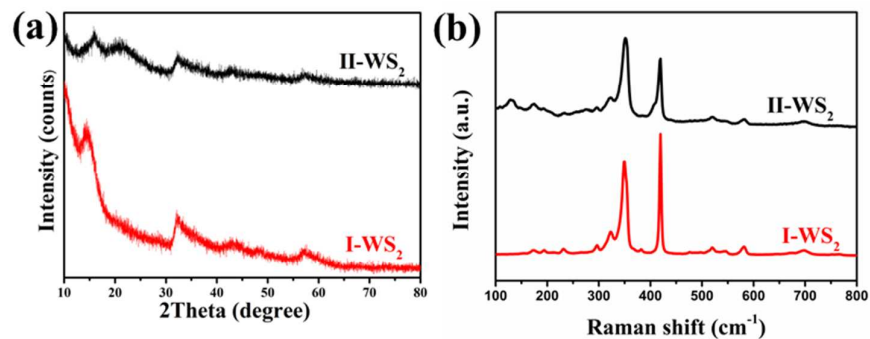

Figure S2. XRD (a) and Raman (b) spectra for the  $\square$ -WS<sub>2</sub> and  $\square$ -WS<sub>2</sub>.

After the exfoliation, the intensities for all the diffraction peak of WS<sub>2</sub> nanosheets decrease obviously. As shown in Figure S2, the XRD pattern of II-WS<sub>2</sub> shows weaker peaks than I-WS<sub>2</sub>, indicating the higher exfoliation ratio and thinner layer of the WS<sub>2</sub> nanosheets. For the Raman spectra, new peaks of J<sub>1</sub>, J<sub>2</sub>, and J<sub>3</sub> will appear after exfoliation. These new peaks of II-WS<sub>2</sub> are higher than those from I-WS<sub>2</sub>, indicating the higher 1T-type percentage in the II-WS<sub>2</sub> nanosheets.

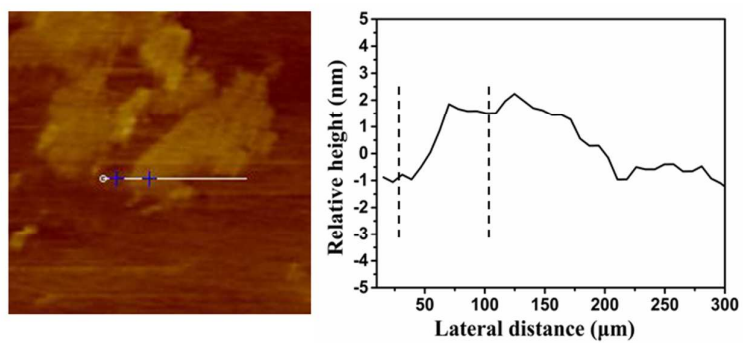

**Figure S3.** AFM image of the exfoliated WS<sub>2</sub> nanosheets.

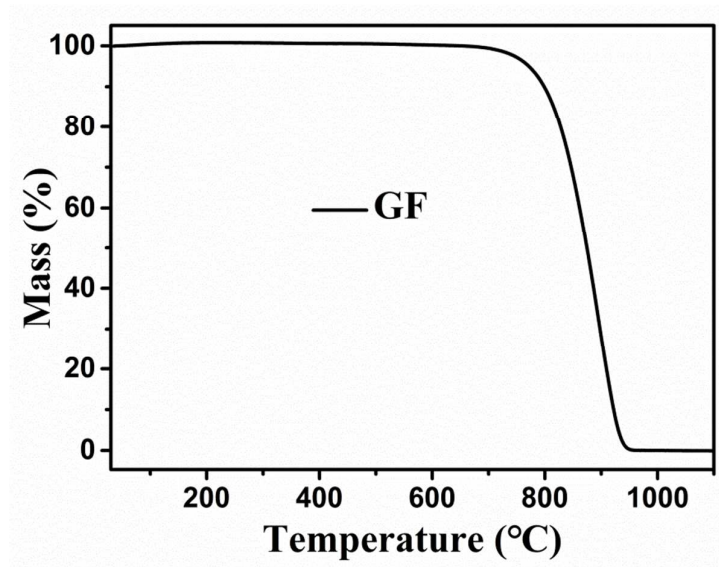

**Figure S4.** TGA thermogram of graphite foam.

The etched GF struts has been analyzed by TGA. After the calcination in air until 900 °C, 100% of the GF could be burned, indicating that no residual nickel was left in the GF.

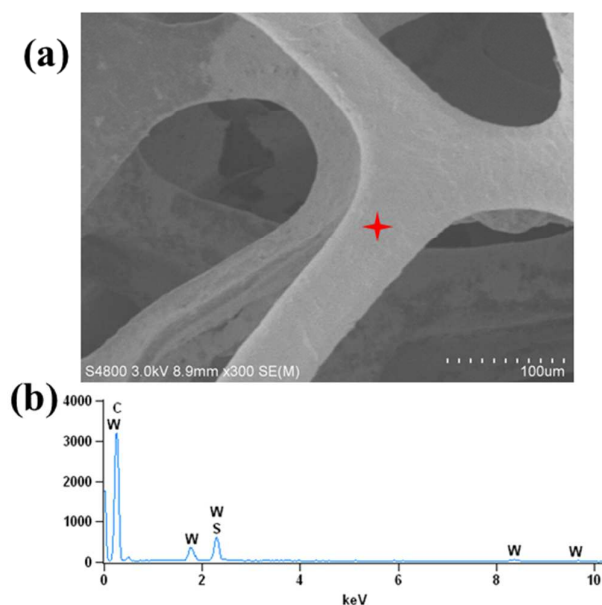

**Figure S5.** (a) SEM image of WS<sub>2</sub>/GF composite; (b) EDS spectra of the red point selected from Figure S5a.

The WS<sub>2</sub>/GF electrode has been tested by EDS, which possess only carbon, tungsten and sulfur. The absence of nickel indicates the successful and completely etching of Ni.

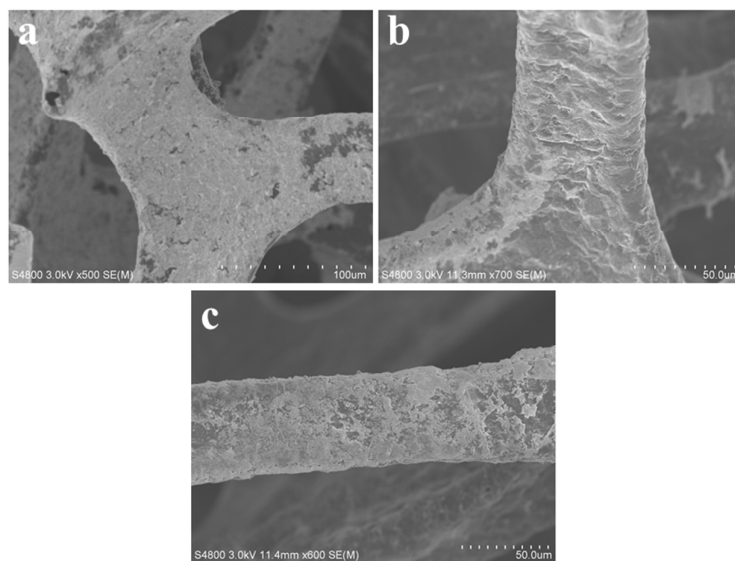

**Figure S6.** SEM images of WS<sub>2</sub>/GF (a), WS<sub>2</sub>/GF after 100 cycles (b) and 200 cycles (c).

The structure of the composite electrode and the electrode after 100 and 200 cycles has been analyzed by SEM. The WS<sub>2</sub> nanosheets were found tightly coated on the GF surface even after 100 and 200 cycles.

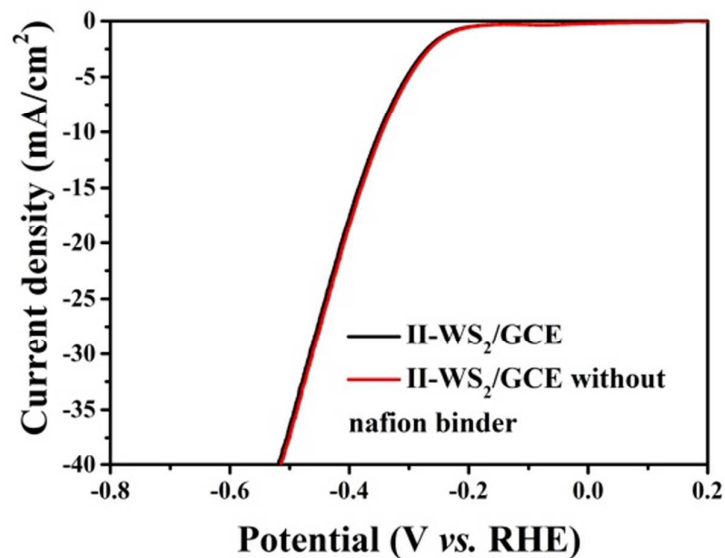

Figure S7. The electrochemical performance of the WS<sub>2</sub>/GCE electrodes with and without binder.

The electrochemical performance of the II-WS<sub>2</sub>/GCE without Nafion binder electrode was also investigated (Figure S7). No obvious difference could be observed with or without binder, indicating that addition of Nafion binder will not significantly decrease the activity of the electrodes. However, without the addition of Nafion binder, WS<sub>2</sub> nanosheets will peel off from the GCE substrate after several cycles during the experiment.



**Table S1.** Comparison of HER activities for the WS<sub>2</sub>/GF and other HER electrocatalysts.

| Materials                                                          | $\eta_{10}$ (mV vs RHE) | Tafel slope (mV/dec) | Ref.      |
|--------------------------------------------------------------------|-------------------------|----------------------|-----------|
| Free-standing NiO@C                                                | -250                    | 134                  | S3        |
| THTNi 2DSP<br>(free-standing organic 2D nanosheets)                | -280                    | 80.5                 | S4        |
| 3D ReS <sub>2</sub> (chemical growth on free-standing carbon foam) | -336                    |                      | S5        |
| WS <sub>2</sub> -CNT                                               | -684                    | 182                  | S6        |
| WS <sub>2</sub> /GF                                                | -190                    | 84                   | This work |

In Table S1, we listed some representative free-standing HER electrodes for comparison. All of these free-standing electrodes have larger overpotential and Tafel slopes than our electrodes. Specially, the organic THTNi 2DSP has a similar Tafel slope of ~80 mV/dec. Its  $\eta_{10}$  is however much larger than our electrode, and its preparation is difficult to perform on a large scale.

## References

- (S1) Matsuda, S.; Kubo, Y.; Uosaki, K.; Nakanishi, S., Lithium-Metal Deposition/Dissolution within Internal Space of CNT 3D Matrix Results in Prolonged Cycle of Lithium-Metal Negative Electrode. *Carbon* **2017**, *119*, 119-123.
- (S2) Fu, P.; Xu, K.; Song, H.; Chen, G.; Yang, J.; Niu, Y., Preparation, Stability and Rheology of Polyacrylamide/Pristine Layered Double Hydroxide Nanocomposites. *J. Mater. Chemie.* **2010**, *20*, 3869.
- (S3) Dong, Q.; Sun, C.; Dai, Z.; Zang, X.; Dong, X., Free-Standing NiO@C Nanobelt as an Efficient Catalyst for Water Splitting. *ChemCatChem.* **2016**, *8*, 3484-3489.
- (S4) Dong, R.; Pfeiffermann, M.; Liang, H.; Zheng, Z.; Zhu, X.; Zhang, J.; Feng, X., Large-area, Free-standing, Two-dimensional Supramolecular Polymer Single-Layer

Sheets for Highly Efficient Electrocatalytic Hydrogen Evolution. *Angew. Chemie. Int. Ed.* **2015**, *54*, 12058-12063.

(S5) Wang, L.; Sofer, Z.; Luxa, J.; Sedmidubský, D.; Ambrosi, A.; Pumera, M., Layered Rhenium Sulfide on Free-standing Three-dimensional Electrodes is Highly Catalytic for the Hydrogen Evolution Reaction: Experimental and Theoretical Study. *Electrochem. Commun.* **2016**, *63*, 39-43.

(S6) Lin, J.-F.; Pitkänen, O.; Mäklin, J.; Puskas, R.; Kukovecz, A.; Dombovari, A.; Toth, G.; Kordas, K., Synthesis of Tungsten Carbide and Tungsten Disulfide on Vertically Aligned Multi-walled Carbon Nanotube Forests and their Application as Non-Pt Electrocatalysts for the Hydrogen Evolution Reaction. *J. mater. Chem. A* **2015**, *3*, 14609-14616.

(S7) Voiry, D.; Yamaguchi, H.; Li, J.; Silva, R.; Alves, D. C. B.; Fujita, T.; Chen, M.; Asefa, T.; Shenoy, V. B.; Eda, G.; Chhowalla, M., Enhanced Catalytic Activity in Strained Chemically Exfoliated WS<sub>2</sub> Nanosheets for Hydrogen Evolution. *Nat. Mater.* **2013**, *12*, 850-855.
